# Supplementary material
Source: ML conference proceedings conference paper supplement (https://proceedings.neurips.cc/paper_files/paper/2019/hash/a44ba9086b2b83ccf2baf7c678723449-Abstract.html)
Supplement: Supplementary file 1 [file a44ba9086b2b83ccf2baf7c678723449-Supplemental.zip]

Archive with 1 entries (1 files):
- main_withAppendix.pdf
